# Supplementary material for: Construction of integrated curriculum for medical English based on questionnaire surveys
Source: Research Square preprint supplement (doi:10.21203/rs.3.rs-8667925/v1), 2026-02-16
Supplement: Supplementary file 1 [file c5e537036413b5cd98a1f6fa.pdf]

## Questionnaire A (For Supervisors in Basic Medical College)

Survey on the Curriculum Design of Medical English-- July 7, 2025

### Question 1: Age

[Single Choice]

| Options                   | Number | Percentage |
|---------------------------|--------|------------|
| 21-30 years old           | 3      | 10.00%     |
| 31-40 years old           | 5      | 16.67%     |
| 41-50 years old           | 9      | 30.00%     |
| 51-60 years old           | 13     | 43.33%     |
| Number of valid responses | 30     |            |

### Question 2: Professional Title

[Single Choice]

| Options                   | Number | Percentage |
|---------------------------|--------|------------|
| Assistant                 | 0      | 0.00%      |
| Lecturer                  | 9      | 30.00%     |
| Associate Professor       | 11     | 36.67%     |
| Professor                 | 10     | 33.33%     |
| Number of valid responses | 30     |            |

### Question 3: Academic Degree

[Single Choice]

| Options                   | Number | Percentage |
|---------------------------|--------|------------|
| Bachelor                  | 0      | 0.00%      |
| Master                    | 7      | 23.33%     |
| Doctor                    | 23     | 76.67%     |
| Number of valid responses | 30     |            |

### Question 4: Type of Supervisor

[Single Choice ]

| Options                   | Number | Percentage |
|---------------------------|--------|------------|
| Master's Supervisor Only  | 19     | 63.33%     |
| PhD & Master's Supervisor | 11     | 26.67%     |
| Number of valid responses | 30     |            |

**Question 5: Do you think it is necessary to offer a series of Medical English courses for undergraduate medical students?**

[Single Choice]

| Options                   | Number | Percentage |        |
|---------------------------|--------|------------|--------|
| Completely necessary      | 18     | 60.00%     | 83.33% |
| Very necessary            | 5      | 16.67%     |        |
| Generally necessary       | 2      | 6.67%      |        |
| Not necessary             | 5      | 16.67%     |        |
| Number of valid responses | 30     |            |        |

**Question 6: The abilities to cultivate for undergraduate students through medical English learning**

[Multiple Choice]

| Options                      | Number | Percentage |
|------------------------------|--------|------------|
| General medical conversation | 21     | 70.00%     |
| General medical reading      | 26     | 86.67%     |
| General medical writing      | 22     | 73.33%     |
| General medical translation  | 20     | 66.67%     |
| Number of valid responses    | 30     |            |

**Question 7: Medical English courses that will be offered for undergraduate medical students [Please select only 3]**

[Single Choice]

| Options                         | Number | Percentage |
|---------------------------------|--------|------------|
| Medical Humanities              | 6      | 20.00%     |
| Medical Vocabulary/Terminology  | 13     | 43.33%     |
| Medical Popular Science Reading | 7      | 23.33%     |
| English Academic Writing        | 4      | 13.33%     |
| Other                           | 0      | 0.00%      |
| Number of valid responses       | 30     |            |

**Question 8: The course attribute and class hours of the Medical Humanities for undergraduates in Question 7**

[Single Choice]

| Options                     | Number | Percentage |
|-----------------------------|--------|------------|
| Selective / 32 class hours  | 18     | 60%        |
| Selective / 16 class hours  | 9      | 30%        |
| Compulsory / 32 class hours | 2      | 6.67%      |
| Compulsory / 16 class hours | 1      | 3.33%      |
| Number of valid responses   | 30     |            |

**Question 9: The course attribute and class hours of the [Medical Vocabulary/Terminology](#) for undergraduates**

[Single Choice]

| Options                                     | Number | Percentage |
|---------------------------------------------|--------|------------|
| Selective / 48 class hours                  | 8      | 26.67%     |
| Selective / 64 class hours                  | 1      | 3.33%      |
| <a href="#">Compulsory / 48 class hours</a> | 19     | 63.33%     |
| Compulsory / 64 class hours                 | 2      | 6.67%      |
| Number of valid responses                   | 30     |            |

**Question 10: The course attribute and class hours of the [Medical Popular Science Reading](#) for undergraduates**

[Single Choice]

| Options                                     | Number | Percentage |
|---------------------------------------------|--------|------------|
| Selective / 32 class hours                  | 8      | 26.67%     |
| Selective / 16 class hours                  | 6      | 20.00%     |
| <a href="#">Compulsory / 32 class hours</a> | 13     | 43.33%     |
| Compulsory / 16 class hours                 | 3      | 10.00%     |
| Number of valid responses                   | 30     |            |

**Question 11: The course attribute and class hours of the [English Academic Writing](#) for undergraduates**

[Single Choice]

| Options                     | Number | Percentage |
|-----------------------------|--------|------------|
| Selective / 32 class hours  | 11     | 36.67%     |
| Selective / 16 class hours  | 9      | 30.00%     |
| Compulsory / 32 class hours | 8      | 26.67%     |
| Compulsory / 16 class hours | 2      | 6.67%      |
| Number of valid responses   | 30     |            |

**Question 12: If only one course is offered per semester, when to start the courses selected in Question 7 respectively?**

[Single Choice]

| Options                           | Number | Percentage |
|-----------------------------------|--------|------------|
| Semesters 1, 2, 3                 | 6      | 20.00%     |
| <a href="#">Semesters 2, 3, 4</a> | 11     | 36.67%     |
| Semesters 3, 4, 5                 | 2      | 6.67%      |
| Semesters 4, 5, 6                 | 4      | 13.33%     |
| <a href="#">Semesters 5, 6, 7</a> | 7      | 23.33%     |
| Number of valid responses         | 30     |            |

**Question 13: Do you think it is necessary to offer a series of medical English courses for Postgraduates?**

[Single Choice]

| Options                   | Number | Percentage |
|---------------------------|--------|------------|
| Yes                       | 26     | 86.67%     |
| No                        | 4      | 13.33%     |
| Number of valid responses | 30     |            |

**Question 14: The abilities to cultivate for postgraduates through medical English learning**

[Multiple Choice]

| Options                    | Number | Percentage |
|----------------------------|--------|------------|
| SCI Writing                | 26     | 86.67%     |
| Medical Conversation       | 20     | 66.67%     |
| Medical Literature Reading | 29     | 96.67%     |
| Medical Translation        | 16     | 53.33%     |
| Number of valid responses  | 30     |            |

**Question 15: Medical English courses that will be offered for postgraduates**  
**[Please select only 3]**

[Single Choice]

| Options                    | Number | Percentage |
|----------------------------|--------|------------|
| Medical Literature Reading | 11     | 36.67%     |
| Medical Conversation       | 5      | 16.67%     |
| Medical Writing            | 10     | 33.33%     |
| Medical Translation        | 4      | 13.33%     |
| Other                      | 0      | 0.00%      |
| Number of valid responses  | 30     |            |

**Question 16: The course attribute and class hours of the Medical Literature Reading for postgraduates in Question 15**

[Single Choice]

| Options                     | Number | Percentage |
|-----------------------------|--------|------------|
| Selective / 32 class hours  | 6      | 20.00%     |
| Selective / 48 class hours  | 1      | 3.33%      |
| Compulsory / 32 class hours | 22     | 73.33%     |
| Compulsory / 48 class hours | 1      | 3.33%      |
| Number of valid responses   | 30     |            |

**Question 17: The course attribute and class hours of the [Medical Conversation](#) for postgraduates [Single Choice]**

| <b>Options</b>                             | <b>Number</b> | <b>Percentage</b> |
|--------------------------------------------|---------------|-------------------|
| <a href="#">Selective / 32 class hours</a> | 14            | 46.67%            |
| Selective / 16 class hours                 | 13            | 43.33%            |
| Compulsory / 32 class hours                | 3             | 10%               |
| Compulsory / 16 class hours                | 0             | 0%                |
| Number of valid responses                  | 30            |                   |

**Question 18: The course attribute and class hours of the [Medical Writing](#) for postgraduates [Single Choice]**

| <b>Options</b>                             | <b>Number</b> | <b>Percentage</b> |
|--------------------------------------------|---------------|-------------------|
| <a href="#">Selective / 32 class hours</a> | 11            | 36.67%            |
| Selective / 16 class hours                 | 9             | 30.00%            |
| Compulsory / 32 class hours                | 9             | 30.00%            |
| Compulsory / 16 class hours                | 1             | 3.33%             |
| Number of valid responses                  | 30            |                   |

**Question 19: The course attribute and class hours of the [Medical Translation](#) for postgraduates [Single Choice]**

| <b>Options</b>              | <b>Number</b> | <b>Percentage</b> |
|-----------------------------|---------------|-------------------|
| Selective / 32 class hours  | 10            | 33.33%            |
| Selective / 16 class hours  | 12            | 40%               |
| Compulsory / 32 class hours | 6             | 20%               |
| Compulsory / 16 class hours | 2             | 6.67%             |
| Number of valid responses   | 30            |                   |

**Question 20: If only one course is offered per semester, when to start the courses selected in Question 15 respectively?**

[Single Choice]

| <b>Options</b>                    | <b>Number</b> | <b>Percentage</b> |
|-----------------------------------|---------------|-------------------|
| <a href="#">Semesters 1 and 2</a> | 19            | 63.33%            |
| Semesters 2 and 3                 | 6             | 20%               |
| Semesters 3 and 4                 | 1             | 3.33%             |
| Semesters 4 and 5                 | 4             | 13.33%            |
| Number of valid responses         | 30            |                   |

**Question 21: Due to different training objectives, do you think medical English courses should be offered separately for academic postgraduates and professional postgraduates?**

[Single Choice]

| Options                   | Number | Percentage |
|---------------------------|--------|------------|
| Completely Necessary      | 9      | 30.00%     |
| Very Necessary            | 5      | 16.67%     |
| Generally Necessary       | 5      | 16.67%     |
| Unnecessary               | 11     | 36.67%     |
| Number of valid responses | 30     |            |

**Question 22: Medical English courses that will be offered for doctoral students**  
[Please select only 2]

[Multiple Choice ]

| Options                             | Number | Percentage |
|-------------------------------------|--------|------------|
| SCI Writing                         | 11     | 36.67%     |
| Medical Conversation                | 7      | 23.33%     |
| International Conference Simulation | 10     | 33.33%     |
| Medical Translation                 | 2      | 6.67%      |
| Other                               | 0      | 0.00%      |
| Number of valid responses           | 30     |            |

**Question 23: The time to start the courses selected in Question 22 respectively**

[Single Choice]

| Options                   | Number | Percentage |
|---------------------------|--------|------------|
| Semester 1                | 11     | 36.67%     |
| Semester 2                | 9      | 30.00%     |
| Semester 3                | 6      | 20.00%     |
| Semester 4                | 4      | 13.33%     |
| Semester 5                | 0      | 0.00%      |
| Number of valid responses | 30     |            |

**Question 24: The course attribute and class hours of SCI Writing for doctoral students in Question 22** [Single Choice]

| Options                     | Number | Percentage |
|-----------------------------|--------|------------|
| Selective / 32 class hours  | 9      | 30.00%     |
| Selective / 16 class hours  | 4      | 13.33%     |
| Compulsory / 32 class hours | 10     | 33.33%     |
| Compulsory / 16 class hours | 7      | 23.33%     |
| Number of valid responses   | 30     |            |

**Question 25: The course attribute and class hours of **Medical Conversation** for doctoral students [Single Choice]**

| <b>Options</b>              | <b>Number</b> | <b>Percentage</b> |
|-----------------------------|---------------|-------------------|
| Selective / 32 class hours  | 12            | 40.00%            |
| Selective / 16 class hours  | 5             | 16.67%            |
| Compulsory / 32 class hours | 9             | 30.00%            |
| Compulsory / 16 class hours | 4             | 13.33%            |
| Number of valid responses   | 30            |                   |

**Question 26: The course attribute and class hours of **International Conference Simulation** for doctoral students [Single Choice]**

| <b>Options</b>              | <b>Number</b> | <b>Percentage</b> |
|-----------------------------|---------------|-------------------|
| Selective / 32 class hours  | 10            | 33.33%            |
| Selective / 16 class hours  | 4             | 13.33%            |
| Compulsory / 32 class hours | 10            | 33.33%            |
| Compulsory / 16 class hours | 6             | 20.00%            |
| Number of valid responses   | 30            |                   |

**Question 27: The course attribute and class hours of **Medical Translation** for doctoral students [Single Choice]**

| <b>Options</b>              | <b>Number</b> | <b>Percentage</b> |
|-----------------------------|---------------|-------------------|
| Selective / 32 class hours  | 5             | 16.67%            |
| Selective / 16 class hours  | 12            | 40.00%            |
| Compulsory / 32 class hours | 4             | 13.33%            |
| Compulsory / 16 class hours | 9             | 30.00%            |
| Number of valid responses   | 30            |                   |

**Question 28: It is difficult for English teachers to teach some medical contents alone. Would you be willing to participate in **collaborative teaching**? [Single Choice]**

| <b>Options</b>            | <b>Number</b> | <b>Percentage</b> |
|---------------------------|---------------|-------------------|
| Yes                       | 18            | 60.00%            |
| No                        | 12            | 40.00%            |
| Number of valid responses | 30            |                   |

**Question 29: Please Evaluate graduates' Medical English Proficiency**

[Single Choice]

| <b>Options</b>            | <b>Number</b> | <b>Percentage</b> |
|---------------------------|---------------|-------------------|
| Excellent                 | 2             | 6.67%             |
| Good                      | 6             | 20%               |
| Fair                      | 14            | 46.67%            |
| Poor                      | 8             | 26.67%            |
| Very Poor                 | 0             | 0%                |
| Number of valid responses | 30            |                   |

**Question 30: The obstacles for graduates when reading literature**

[Multiple Choice]

| <b>Options</b>                    | <b>Number</b> | <b>Percentage</b> |
|-----------------------------------|---------------|-------------------|
| Medical professional knowledge    | 21            | 70.00%            |
| Medical English vocabulary        | 21            | 70.00%            |
| General English vocabulary        | 4             | 13.33%            |
| English grammar knowledge         | 7             | 23.33%            |
| Long and complex English sentence | 10            | 33.33%            |
| Number of valid responses         | 30            |                   |

**Question 31: In Your Opinion, Graduates should often read**

[Single Choice]

| <b>Options</b>                        | <b>Number</b> | <b>Percentage</b> |
|---------------------------------------|---------------|-------------------|
| Literature related to their own major | 27            | 90%               |
| Any literature regardless of majors   | 3             | 10%               |
| Number of valid responses             | 30            |                   |

**Question 32: Considering the large medical vocabulary, what kind of medical terms do graduates should master?**

[Single Choice]

| <b>Options</b>                                | <b>Number</b> | <b>Percentage</b> |
|-----------------------------------------------|---------------|-------------------|
| Medical vocabulary related to their own major | 24            | 80%               |
| All medical vocabulary regardless of majors   | 6             | 20%               |
| Number of valid responses                     | 30            |                   |

**Question 33: Do you suggest that medical college should have relatively fixed teachers to teach English in comprehensive universities where English courses are coordinated by the whole school?**

[Single Choice ]

| Options                   | Number | Percentage |        |
|---------------------------|--------|------------|--------|
| Fully Support             | 12     | 40.00%     | 86.67% |
| Strongly Support          | 9      | 30.00%     |        |
| Generally Support         | 5      | 16.67%     |        |
| Oppose                    | 4      | 13.33%     |        |
| Number of valid responses | 30     |            |        |

**Question 34: What is your opinion on implementing integrated medical English teaching for undergraduate, postgraduate, and doctoral students?**

[Single Choice]

| Options                   | Number | Percentage |        |
|---------------------------|--------|------------|--------|
| Completely Necessary      | 14     | 46.67%     | 96.67% |
| Very Necessary            | 9      | 30.00%     |        |
| Generally Necessary       | 6      | 20.00%     |        |
| Unnecessary               | 1      | 3.33%      |        |
| Number of valid responses | 30     |            |        |

**Question 35 (Subjective Question):**

**Please briefly state your supplementary opinions on medical English teaching.**

Through Deepseek statistics, it was found that the teachers' responses mainly focused on the following two aspects. One was about the integrated teaching of medical English. Among the 26 valid responses, 24 (80.00% of the 30 respondents) expressed their support. The other was about the fixed teachers for medical English. Out of the 25 valid responses, 22 ( 73.33% of the 30 respondents) expressed their support.

## Questionnaire B (For Supervisors in Clinical Medical College)

Survey on the Curriculum Design of Medical English -- May 28, 2025

### Question 1: Gender

[Single Choice]

| Options                   | Number | Percentage |
|---------------------------|--------|------------|
| Male                      | 50     | 68.49%     |
| Female                    | 23     | 31.51%     |
| Number of valid responses | 73     |            |

### Question 2: Age

[Single Choice]

| Options                   | Number | Percentage |
|---------------------------|--------|------------|
| 21-30 years old           | 0      | 0%         |
| 31-40 years old           | 7      | 9.59%      |
| 41-50 years old           | 33     | 45.21%     |
| 51-60 years old           | 33     | 45.21%     |
| Number of valid responses | 73     |            |

### Question 3: Professional Title

[Single Choice]

| Options                                         | Number | Percentage |
|-------------------------------------------------|--------|------------|
| Lecturer (Attending Physician)                  | 6      | 8.22%      |
| Associate Professor (Associate Chief Physician) | 23     | 31.51%     |
| Professor (Chief Physician)                     | 44     | 60.27%     |
| Number of valid responses                       | 73     |            |

### Question 4: Academic Degree

[Single Choice]

| Options                   | Number | Percentage |
|---------------------------|--------|------------|
| Doctor                    | 56     | 76.71%     |
| Master                    | 17     | 23.29%     |
| Bachelor                  | 0      | 0%         |
| Number of valid responses | 73     |            |

**Question 5: Type of Supervisor**

[Single Choice]

| <b>Options</b>                   | <b>Number</b> | <b>Percentage</b> |
|----------------------------------|---------------|-------------------|
| Only Master's Supervisor         | 62            | 84.93%            |
| Master's and Doctoral Supervisor | 11            | 15.07%            |
| Number of valid responses        | 73            |                   |

**Question 6: Department (Secondary Discipline)**

[Single Choice]

| <b>Options</b>                               | <b>Number</b> | <b>Percentage</b> |
|----------------------------------------------|---------------|-------------------|
| General Medicine                             | 1             | 1.37%             |
| Pediatrics                                   | 3             | 4.11%             |
| Otorhinolaryngology                          | 3             | 4.11%             |
| Obstetrics and Gynecology                    | 3             | 4.11%             |
| Emergency Medicine                           | 2             | 2.74%             |
| Rehabilitation Medicine and Physical Therapy | 0             | 0%                |
| Clinical Laboratory Diagnostics              | 0             | 0%                |
| Anesthesiology                               | 3             | 4.11%             |
| Internal Medicine                            | 8             | 10.96%            |
| Dermatology and Venereology                  | 3             | 4.11%             |
| Neurology                                    | 5             | 6.85%             |
| Surgery                                      | 20            | 27.4%             |
| Ophthalmology                                | 1             | 1.37%             |
| Imaging Medicine and Nuclear Medicine        | 2             | 2.74%             |
| Sports Medicine                              | 1             | 1.37%             |
| Oncology                                     | 0             | 0%                |
| Critical Care Medicine                       | 6             | 8.22%             |
| Geriatrics                                   | 0             | 0%                |
| Psychiatry and Mental Health                 | 0             | 0%                |
| Stomatology (Primary Discipline)             | 8             | 10.96%            |
| Other                                        | 4             | 5.48%             |
| Number of valid responses                    | 73            |                   |

**Question 7: Do You Think It Is Necessary to Offer Medical English Courses for Undergraduates?**

[Single Choice]

| <b>Options</b>            | <b>Number</b> | <b>Percentage</b> |
|---------------------------|---------------|-------------------|
| Yes                       | 64            | 87.67%            |
| No                        | 9             | 12.33%            |
| Number of valid responses | 73            |                   |

**Question 8: What courses should be offered for undergraduate students?**

**[Please select only 3]**

[Single Choice]

| Options                         | Number | Percentage |
|---------------------------------|--------|------------|
| Medical Humanities              | 15     | 20.55%     |
| Medical Vocabulary/Terminology  | 32     | 43.84%     |
| Medical Popular Science Reading | 18     | 24.66%     |
| English Academic Writing        | 8      | 10.96%     |
| Other                           | 0      | 0.00%      |
| Number of valid responses       | 73     |            |

**Question 9: The time to start the courses selected in Question 8 respectively**

[Single Choice]

| Options                   | Number | Percentage |
|---------------------------|--------|------------|
| Semesters 1, 2, 3         | 14     | 19.18%     |
| Semesters 2, 3, 4         | 26     | 35.62%     |
| Semesters 3, 4, 5         | 6      | 8.22%      |
| Semesters 4, 5, 6         | 11     | 15.07%     |
| Semesters 5, 6, 7         | 16     | 21.92%     |
| Number of valid responses | 73     |            |

**Question 10: The course attribute and class hours of the Medical Humanities for undergraduates in Question 8**

[Single Choice]

| Options                     | Number | Percentage |
|-----------------------------|--------|------------|
| Selective / 32 class hours  | 42     | 57.53%     |
| Selective / 16 class hours  | 19     | 26.03%     |
| Compulsory / 32 class hours | 8      | 10.96%     |
| Compulsory / 16 class hours | 4      | 5.48%      |
| Number of valid responses   | 73     |            |

**Question 11: The course attribute and class hours of the Medical Vocabulary/Terminology for undergraduates**

[Single Choice]

| Options                     | Number | Percentage |
|-----------------------------|--------|------------|
| Selective / 48 class hours  | 10     | 13.70%     |
| Selective / 64 class hours  | 6      | 8.22%      |
| Compulsory / 48 class hours | 38     | 52.05%     |
| Compulsory / 64 class hours | 19     | 26.03%     |
| Number of valid responses   | 73     |            |

**Question 12: The course attribute and class hours of the [Medical Popular Science Reading](#) for undergraduates**

[Single Choice]

| Options                                     | Number | Percentage |
|---------------------------------------------|--------|------------|
| Selective / 32 class hours                  | 16     | 21.92%     |
| Selective / 16 class hours                  | 8      | 10.96%     |
| <a href="#">Compulsory / 32 class hours</a> | 39     | 53.42%     |
| Compulsory / 16 class hours                 | 10     | 13.70%     |
| Number of valid responses                   | 73     |            |

**Question 13: The course attribute and class hours of the [English Academic Writing](#) for undergraduates**

[Single Choice]

| Options                     | Number | Percentage |
|-----------------------------|--------|------------|
| Selective / 32 class hours  | 24     | 32.88%     |
| Selective / 16 class hours  | 21     | 28.77%     |
| Compulsory / 32 class hours | 18     | 24.66%     |
| Compulsory / 16 class hours | 10     | 13.70%     |
| Number of valid responses   | 73     |            |

**Question 14: Please Evaluate graduates' Medical English Proficiency**

[Single Choice ]

| Options                   | Number | Percentage |
|---------------------------|--------|------------|
| Excellent                 | 3      | 4.11%      |
| Good                      | 21     | 28.77%     |
| <a href="#">Fair</a>      | 45     | 61.64%     |
| Poor                      | 4      | 5.48%      |
| Number of valid responses | 73     |            |

**Question 15: The Obstacles for graduates When Reading Literature**

[Multiple Choice]

| Options                           | Number | Percentage |
|-----------------------------------|--------|------------|
| Medical professional knowledge    | 44     | 60.27%     |
| Medical English vocabulary        | 52     | 71.23%     |
| General English vocabulary        | 14     | 19.18%     |
| English grammar knowledge         | 15     | 20.55%     |
| Long and complex English sentence | 23     | 31.51%     |
| Number of valid responses         | 73     |            |

**Question 16: Do You Think It Is Necessary to Offer Medical English Courses for Postgraduates?**

[Single Choice ]

| Options                   | Number | Percentage |
|---------------------------|--------|------------|
| Completely Necessary      | 25     | 34.25%     |
| Very Necessary            | 32     | 43.84%     |
| Generally Necessary       | 13     | 17.81%     |
| Unnecessary               | 3      | 4.11%      |
| Number of valid responses | 73     |            |

**Question 17: Which Abilities Should be Improved for Postgraduates?**

[Multiple Choice Question]

| Options                    | Number | Percentage |
|----------------------------|--------|------------|
| English Conversation       | 48     | 65.75%     |
| Medical Literature Reading | 62     | 84.93%     |
| Medical Writing            | 50     | 68.49%     |
| Medical Translation        | 32     | 43.84%     |
| Number of valid responses  | 73     |            |

**Question 18: Which courses should be offered for postgraduates?**

[Please select only 3]

[Single Choice]

| Options                    | Number | Percentage |
|----------------------------|--------|------------|
| Medical Literature Reading | 29     | 39.73%     |
| Medical Conversation       | 9      | 12.33%     |
| Medical Writing            | 28     | 38.36%     |
| Medical Translation        | 7      | 9.59%      |
| Other                      | 0      | 0.00%      |
| Number of valid responses  | 73     |            |

**Question 19: The class attribute and class hours of the Medical Literature Reading for postgraduates in Question 18**

[Single Choice]

| Options                     | Number | Percentage |
|-----------------------------|--------|------------|
| Selective / 32 class hours  | 24     | 32.88%     |
| Selective / 48 class hours  | 5      | 6.85%      |
| Compulsory / 32 class hours | 13     | 17.81%     |
| Compulsory / 48 class hours | 31     | 42.47%     |
| Number of valid responses   | 73     |            |

**Question 20: The class attribute and class hours of the Medical Conversation for postgraduates [Single Choice]**

| Options                     | Number | Percentage |
|-----------------------------|--------|------------|
| Selective / 32 class hours  | 37     | 50.68%     |
| Selective / 16 class hours  | 32     | 43.84%     |
| Compulsory / 32 class hours | 3      | 4.11%      |
| Compulsory / 16 class hours | 1      | 1.37%      |
| Number of valid responses   | 73     |            |

**Question 21: The class attribute and class hours of the Medical Writing for postgraduates [Single Choice]**

| Options                     | Number | Percentage |
|-----------------------------|--------|------------|
| Selective / 32 class hours  | 25     | 34.25%     |
| Selective / 16 class hours  | 14     | 19.18%     |
| Compulsory / 32 class hours | 23     | 31.51%     |
| Compulsory / 16 class hours | 11     | 15.07%     |
| Number of valid responses   | 73     |            |

**Question 22: The class attribute and class hours of the Medical Translation for postgraduates [Single Choice]**

| Options                     | Number | Percentage |
|-----------------------------|--------|------------|
| Selective / 32 class hours  | 22     | 30.14%     |
| Selective / 16 class hours  | 28     | 38.36%     |
| Compulsory / 32 class hours | 15     | 20.55%     |
| Compulsory / 16 class hours | 8      | 10.95%     |
| Number of valid responses   | 73     |            |

**Question 23: The Time to Offer Medical English Courses for Master's Studies [Multiple Choice]**

| Options                   | Number | Percentage |
|---------------------------|--------|------------|
| Semester 1                | 69     | 94.52%     |
| Semester 2                | 32     | 43.84%     |
| Semester 3                | 11     | 15.07%     |
| Semester 4                | 6      | 8.22%      |
| Number of valid responses | 73     |            |

**Question 24: Medical English courses that will be offered for doctoral students**

**[Please select only 2]**

[Multiple Choice ]

| Options                             | Number | Percentage |
|-------------------------------------|--------|------------|
| SCI Writing                         | 29     | 39.73%     |
| Medical Conversation                | 11     | 15.07%     |
| International Conference Simulation | 27     | 36.99%     |
| Medical Translation                 | 6      | 8.22%      |
| Other                               | 0      | 0.00%      |
| Number of valid responses           | 73     |            |

**Question 25: The time to start the courses selected in Question 24 respectively**

[Single Choice]

| Options                   | Number | Percentage |
|---------------------------|--------|------------|
| Semester 1                | 31     | 42.47%     |
| Semester 2                | 29     | 39.73%     |
| Semester 3                | 9      | 12.33%     |
| Semester 4                | 4      | 5.48%      |
| Semester 5                | 0      | 0.00%      |
| Number of valid responses | 73     |            |

**Question 26: The course attribute and class hours of SCI Writing for doctoral students in Question 24 [Single Choice]**

| Options                     | Number | Percentage |
|-----------------------------|--------|------------|
| Selective / 32 class hours  | 24     | 32.88%     |
| Selective / 16 class hours  | 8      | 10.96%     |
| Compulsory / 32 class hours | 28     | 38.36%     |
| Compulsory / 16 class hours | 13     | 17.81%     |
| Number of valid responses   | 73     |            |

**Question 27: The course attribute and class hours of Medical Conversation for doctoral students [Single Choice]**

| Options                     | Number | Percentage |
|-----------------------------|--------|------------|
| Selective / 32 class hours  | 26     | 35.62%     |
| Selective / 16 class hours  | 12     | 16.44%     |
| Compulsory / 32 class hours | 24     | 32.88%     |
| Compulsory / 16 class hours | 11     | 15.07%     |
| Number of valid responses   | 73     |            |

**Question 28: The course attribute and class hours of International Conference Simulation for doctoral students** [Single Choice]

| Options                     | Number | Percentage |
|-----------------------------|--------|------------|
| Selective / 32 class hours  | 27     | 36.99%     |
| Selective / 16 class hours  | 12     | 16.44%     |
| Compulsory / 32 class hours | 24     | 32.88%     |
| Compulsory / 16 class hours | 10     | 13.69%     |
| Number of valid responses   | 73     |            |

**Question 29: The course attribute and class hours of Medical Translation for doctoral students** [Single Choice]

| Options                     | Number | Percentage |
|-----------------------------|--------|------------|
| Selective / 32 class hours  | 11     | 15.07%     |
| Selective / 16 class hours  | 28     | 38.36%     |
| Compulsory / 32 class hours | 12     | 16.44%     |
| Compulsory / 16 class hours | 22     | 30.14%     |
| Number of valid responses   | 73     |            |

**Question 30: It is difficult for English teachers to teach some medical contents alone. Would you be willing to participate in collaborative teaching?**

[Single Choice ]

| Options                   | Number | Percentage |
|---------------------------|--------|------------|
| Yes                       | 47     | 64.38%     |
| No                        | 26     | 35.62%     |
| Number of valid responses | 73     |            |

**Question 31: Due to different training objectives, do you think medical English courses should be offered separately for academic postgraduates and professional postgraduates?**

[Single Choice]

| Options                   | Number | Percentage |
|---------------------------|--------|------------|
| Yes                       | 49     | 67.12%     |
| No                        | 24     | 32.88%     |
| Number of valid responses | 73     |            |

**Question 32: You often ask students to read**

[Single Choice ]

| Options                               | Number | Percentage |
|---------------------------------------|--------|------------|
| Literature related to their own major | 67     | 91.78%     |
| Any literature regardless of majors   | 6      | 8.22%      |
| Number of valid responses             | 73     |            |

**Question 33: There are many medical vocabulary, which medical vocabulary do you suggest students mainly master?**

[Single Choice]

| Options                                       | Number | Percentage |
|-----------------------------------------------|--------|------------|
| Medical vocabulary related to their own major | 67     | 91.78%     |
| All medical vocabulary                        | 6      | 8.22%      |
| Number of valid responses                     | 73     |            |

**Question 34: Do You Think It Is Necessary to Implement Integrated Medical English Teaching for Undergraduate, Postgraduate, and Doctoral Students?**

[Single Choice]

| Options                   | Number | Percentage |        |
|---------------------------|--------|------------|--------|
| Completely Necessary      | 21     | 28.77%     |        |
| Very Necessary            | 30     | 41.1%      | 93.15% |
| Generally Necessary       | 17     | 23.29%     |        |
| Not necessary             | 5      | 6.85%      |        |
| Number of valid responses | 73     |            |        |

**Question 35 (Subjective Question):**

**Please briefly describe your additional views on medical English teaching.**

Using Deepseek statistics, it was found that teachers' responses mainly focused on the two aspects: first, integrated teaching of medical English. Among the 57 valid respondents, 51 expressed their support (69% of the total 73 respondents). The second was the subject-centered medical English teaching for clinical postgraduates. Out of 56 valid responses, 50 expressed their support (68% of the total 73 respondents).

**Questionnaire C (For 866 postgraduates from 23 universities in China )**  
**Survey on the Curriculum Design of Medical English-- May 28, 2025**

**Question 1: Medical School**

[Single Choice]

|    | <b>Options</b>                                          | <b>Number</b> | <b>Percentage</b> |
|----|---------------------------------------------------------|---------------|-------------------|
| 1  | Heilongjiang University of Traditional Chinese Medicine | 77            | 8.69%             |
| 2  | Qiqihar Medical College                                 | 28            | 3.16%             |
| 3  | Bengbu Medical University                               | 41            | 4.63%             |
| 4  | Ningxia Medical University                              | 48            | 5.42%             |
| 5  | Anhui Medical University                                | 46            | 5.19%             |
| 6  | Kunming Medical University                              | 32            | 3.61%             |
| 7  | Hainan Medical University                               | 24            | 2.71%             |
| 8  | Xinjiang Medical University                             | 20            | 2.26%             |
| 9  | Shandong First Medical University                       | 34            | 3.84%             |
| 10 | Harbin Medical University                               | 23            | 2.60%             |
| 11 | China Medical University                                | 28            | 3.16%             |
| 12 | Xi'an Medical College                                   | 25            | 2.82%             |
| 13 | Dalian Medical University                               | 25            | 2.82%             |
| 14 | Shandong Second Medical University                      | 34            | 3.84%             |
| 15 | Chongqing Medical University                            | 22            | 2.48%             |
| 16 | Fujian Medical University                               | 27            | 3.05%             |
| 17 | Jining Medical College                                  | 24            | 2.71%             |
| 18 | Guangxi Medical University                              | 86            | 9.71%             |
| 19 | Guizhou Medical University                              | 31            | 3.50%             |
| 20 | Binzhou Medical College                                 | 24            | 2.71%             |
| 21 | Nanjing Medical University                              | 23            | 2.60%             |
| 22 | Yanbian University                                      | 105           | 11.85%            |
| 23 | Hubei Medical College                                   | 26            | 2.93%             |
| 24 | Other medical schools                                   | 33            | 3.72%             |
|    | Number of valid responses                               | 886           |                   |

**Question 2: Gender**

[Single Choice]

|  | <b>Options</b>            | <b>Number</b> | <b>Percentage</b> |
|--|---------------------------|---------------|-------------------|
|  | Male                      | 308           | 34.76%            |
|  | Female                    | 578           | 65.24%            |
|  | Number of valid responses | 886           |                   |

**Question 3: Age**

[Single Choice]

| <b>Options</b>            | <b>Number</b> | <b>Percentage</b> |
|---------------------------|---------------|-------------------|
| Under 20 years old        | 4             | 0.45%             |
| 21-30 years old           | 736           | 83.07%            |
| 31-40 years old           | 124           | 14%               |
| 41-50 years old           | 22            | 2.48%             |
| Number of valid responses | 886           |                   |

**Question 4: Type of Postgraduate**

[Single Choice]

| <b>Options</b>            | <b>Number</b> | <b>Percentage</b> |
|---------------------------|---------------|-------------------|
| Academic Postgraduate     | 426           | 48.08%            |
| Professional Postgraduate | 460           | 51.92%            |
| Number of valid responses | 886           |                   |

**Question 5: Do you think medical English courses should be offered separately for academic graduates and professional graduates?**

[Single Choice]

| <b>Options</b>            | <b>Number</b> | <b>Percentage</b> |
|---------------------------|---------------|-------------------|
| Yes                       | 497           | 56.09%            |
| No                        | 389           | 43.91%            |
| Number of valid responses | 886           |                   |

**Question 6: Research Direction (Secondary Discipline)**

[Single Choice]

| <b>Options</b>                               | <b>Number</b> | <b>Percentage</b> |
|----------------------------------------------|---------------|-------------------|
| General Medicine                             | 7             | 0.79%             |
| Pediatrics                                   | 25            | 2.82%             |
| Otorhinolaryngology                          | 17            | 1.92%             |
| Obstetrics and Gynecology                    | 54            | 6.09%             |
| Emergency Medicine                           | 12            | 1.35%             |
| Rehabilitation Medicine and Physical Therapy | 10            | 1.13%             |
| Clinical Laboratory Diagnostics              | 19            | 2.14%             |
| Anesthesiology                               | 20            | 2.26%             |
| Internal Medicine                            | 95            | 10.72%            |
| Dermatology and Venereology                  | 23            | 2.6%              |
| Neurology                                    | 30            | 3.39%             |
| Surgery                                      | 99            | 11.17%            |
| Ophthalmology                                | 25            | 2.82%             |
| Imaging Medicine and Nuclear Medicine        | 21            | 2.37%             |
| Sports Medicine                              | 5             | 0.56%             |
| Oncology                                     | 38            | 4.29%             |
| Critical Care Medicine                       | 14            | 1.58%             |
| Geriatrics                                   | 4             | 0.45%             |
| Psychiatry and Mental Health                 | 5             | 0.56%             |
| Other                                        | 363           | 40.97%            |
| Number of valid responses                    | 886           |                   |

**Question 7: Current General English Level**

[Single Choice]

| <b>Options</b>             | <b>Number</b> | <b>Percentage</b> |
|----------------------------|---------------|-------------------|
| Not yet passed CET-4       | 78            | 8.8%              |
| Passed CET-4 but not CET-6 | 391           | 44.13%            |
| Passed CET-6               | 417           | 47.07%            |
| Number of valid responses  | 886           |                   |

**Question 8: Were Medical English Courses Offered During Your Undergraduate Studies?**

[Single Choice]

| <b>Options</b>            | <b>Number</b> | <b>Percentage</b> |
|---------------------------|---------------|-------------------|
| Yes                       | 639           | 72.12%            |
| No                        | 247           | 27.88%            |
| Number of valid responses | 886           |                   |

**Question 9: Were Medical English Courses Offered During Your Postgraduate Studies?**

[Single Choice]

| Options                   | Number | Percentage |
|---------------------------|--------|------------|
| Yes                       | 759    | 85.67%     |
| No                        | 127    | 14.33%     |
| Number of valid responses | 886    |            |

**Question 10: Is there a poor connection between undergraduate and graduate medical English courses?**

[Single Choice]

| Options                   | Number | Percentage |
|---------------------------|--------|------------|
| Yes                       | 635    | 71.67%     |
| No                        | 251    | 28.33%     |
| Number of valid responses | 886    |            |

**Question 11: Is there any repetition between undergraduate and graduate medical English courses?**

[Single Choice]

| Options                   | Number | Percentage |
|---------------------------|--------|------------|
| Yes                       | 655    | 73.93%     |
| No                        | 231    | 26.07%     |
| Number of valid responses | 886    |            |

**Question 12: Do You Think It Is Necessary to Offer Medical English Courses for Undergraduates?**

[Single Choice]

| Options                   | Number | Percentage |
|---------------------------|--------|------------|
| Yes                       | 744    | 83.97%     |
| No                        | 142    | 16.03%     |
| Number of valid responses | 886    |            |

**Question 13: What courses should be offered for undergraduate students?**

[Please select only 3]

[Single Choice ]

| Options                         | Number | Percentage |
|---------------------------------|--------|------------|
| Medical Humanities              | 161    | 18.17%     |
| Medical Vocabulary/Terminology  | 361    | 40.74%     |
| Medical Popular Science Reading | 265    | 29.91%     |
| English Academic Writing        | 92     | 10.38%     |
| Other                           | 7      | 0.79%      |
| Number of valid responses       | 886    |            |

**Question 14: The time to start the courses selected in Question 13 respectively**

[Single Choice]

| Options                   | Number | Percentage |
|---------------------------|--------|------------|
| Semesters 1, 2, 3         | 228    | 25.73%     |
| Semesters 2, 3, 4         | 275    | 31.04%     |
| Semesters 3, 4, 5         | 82     | 9.26%      |
| Semesters 4, 5, 6         | 88     | 9.93%      |
| Semesters 5, 6, 7         | 213    | 24.04%     |
| Number of valid responses | 886    |            |

**Question 15: The course attribute and class hours of the Medical Humanities for undergraduates in Question 13**

[Single Choice]

| Options                     | Number | Percentage |
|-----------------------------|--------|------------|
| Selective / 32 class hours  | 435    | 49.10%     |
| Selective / 16 class hours  | 213    | 24.04%     |
| Compulsory / 32 class hours | 117    | 13.21%     |
| Compulsory / 16 class hours | 121    | 13.66%     |
| Number of valid responses   | 886    |            |

**Question 16: The course attribute and class hours of the Medical Vocabulary/Terminology for undergraduates**

[Single Choice]

| Options                     | Number | Percentage |
|-----------------------------|--------|------------|
| Selective / 48 class hours  | 127    | 14.33%     |
| Selective / 64 class hours  | 101    | 11.40%     |
| Compulsory / 48 class hours | 462    | 52.14%     |
| Compulsory / 64 class hours | 196    | 22.12%     |
| Number of valid responses   | 886    |            |

**Question 17: The course attribute and class hours of the Medical Popular Science Reading for undergraduates**

[Single Choice]

| Options                     | Number | Percentage |
|-----------------------------|--------|------------|
| Selective / 32 class hours  | 254    | 28.67%     |
| Selective / 16 class hours  | 92     | 10.38%     |
| Compulsory / 32 class hours | 445    | 50.23%     |
| Compulsory / 16 class hours | 95     | 10.72%     |
| Number of valid responses   | 886    |            |

**Question 18: The course attribute and class hours of the English Academic Writing for undergraduates**

[Single Choice]

| Options                     | Number | Percentage |
|-----------------------------|--------|------------|
| Selective / 32 class hours  | 223    | 25.17%     |
| Selective / 16 class hours  | 265    | 29.91%     |
| Compulsory / 32 class hours | 197    | 22.23%     |
| Compulsory / 16 class hours | 201    | 22.69%     |
| Number of valid responses   | 886    |            |

**Question 19: Do You Think It Is Necessary to Offer Medical English Courses for Postgraduates?**

[Single Choice]

| Options                   | Number | Percentage |
|---------------------------|--------|------------|
| Yes                       | 827    | 93.34%     |
| No                        | 59     | 6.66%      |
| Number of valid responses | 886    |            |

**Question 20: Time to Study Medical English for Postgraduates**

[Multiple Choice]

| Options                   | Number | Percentage |
|---------------------------|--------|------------|
| Semester 1                | 767    | 86.57%     |
| Semester 2                | 246    | 27.77%     |
| Semester 3                | 73     | 8.24%      |
| Semester 4                | 28     | 3.16%      |
| Semester 5                | 18     | 2.03%      |
| Number of valid responses | 886    |            |

**Question 21: Which medical English courses should be offered for postgraduate students? [Please select only 3]**

[Single Choice]

| Options                    | Number | Percentage |
|----------------------------|--------|------------|
| Medical Literature Reading | 351    | 39.62%     |
| Medical Conversation       | 94     | 10.61%     |
| Medical Writing            | 347    | 39.16%     |
| Medical Translation        | 91     | 10.27%     |
| Other                      | 3      | 0.33%      |
| Number of valid responses  | 886    |            |

**Question 22: The class attribute and class hours of the Medical Literature Reading for postgraduates in Question 21**

[Single Choice]

| Options                     | Number | Percentage |
|-----------------------------|--------|------------|
| Selective / 32 class hours  | 233    | 26.30%     |
| Selective / 48 class hours  | 93     | 10.50%     |
| Compulsory / 32 class hours | 484    | 54.63%     |
| Compulsory / 48 class hours | 76     | 8.58%      |
| Number of valid responses   | 886    |            |

**Question 23: The class attribute and class hours of the Medical Conversation for postgraduates** [Single Choice]

| Options                     | Number | Percentage |
|-----------------------------|--------|------------|
| Selective / 32 class hours  | 389    | 43.91%     |
| Selective / 16 class hours  | 119    | 13.43%     |
| Compulsory / 32 class hours | 281    | 31.72%     |
| Compulsory / 16 class hours | 97     | 10.95%     |
| Number of valid responses   | 886    |            |

**Question 24: The class attribute and class hours of the Medical Writing for postgraduates** [Single Choice]

| Options                     | Number | Percentage |
|-----------------------------|--------|------------|
| Selective / 32 class hours  | 337    | 38.04%     |
| Selective / 16 class hours  | 74     | 8.35%      |
| Compulsory / 32 class hours | 314    | 35.44%     |
| Compulsory / 16 class hours | 161    | 18.17%     |
| Number of valid responses   | 886    |            |

**Question 25: The class attribute and class hours of the Medical Translation for postgraduates** [Single Choice]

| Options                     | Number | Percentage |
|-----------------------------|--------|------------|
| Selective / 32 class hours  | 223    | 25.17%     |
| Selective / 16 class hours  | 240    | 27.09%     |
| Compulsory / 32 class hours | 206    | 23.25%     |
| Compulsory / 16 class hours | 217    | 24.49%     |
| Number of valid responses   | 886    |            |

**Question 26: The Obstacles in Medical English Learning for postgraduates**

[Multiple Choice]

| Options                        | Number | Percentage |
|--------------------------------|--------|------------|
| Medical professional knowledge | 483    | 54.51%     |
| Medical English vocabulary     | 583    | 65.8%      |
| General English vocabulary     | 191    | 21.56%     |
| English grammar knowledge      | 210    | 23.7%      |
| English long sentence analysis | 301    | 33.97%     |
| Medical literature reading     | 436    | 49.21%     |
| English paper writing          | 401    | 45.26%     |
| Other                          | 22     | 2.48%      |
| Number of valid responses      | 886    |            |

**Question 27: What literature materials do you often read?**

[Single Choice]

| Options                                       | Number | Percentage |
|-----------------------------------------------|--------|------------|
| Literature materials related to your major    | 835    | 94.24%     |
| Any literature materials regardless of majors | 51     | 5.76%      |
| Number of valid responses                     | 886    |            |

**Question 28: What kind of medical vocabulary you often master?**

[Single Choice]

| Options                                    | Number | Percentage |
|--------------------------------------------|--------|------------|
| Medical vocabularies related to your major | 779    | 87.92%     |
| All medical vocabularies                   | 107    | 12.08%     |
| Number of valid responses                  | 886    |            |

**Question 29: Do You Think It Is Necessary to Implement Integrated Medical English Teaching for Undergraduate, Postgraduate, and Doctoral Students?**

[Single Choice]

| Options                   | Number | Percentage |
|---------------------------|--------|------------|
| Completely Necessary      | 341    | 38.49%     |
| Very Necessary            | 289    | 32.62%     |
| Generally Necessary       | 187    | 21.11%     |
| Not necessary             | 69     | 7.79%      |
| Number of valid responses | 886    |            |

**Question 30: Do you suggest implementing subject-centered medical English teaching?**

[Single Choice]

| Options                   | Number | Percentage |
|---------------------------|--------|------------|
| Yes                       | 763    | 86.12%     |
| No                        | 123    | 13.88%     |
| Number of valid responses | 886    |            |

**Question 31 (Subjective Question):**

**Please briefly describe your additional views on medical English teaching.**

Through Deepseek statistics, it was found that students' responses mainly focused on the two aspects. One was the integrated teaching of medical English. Among the 546 valid questionnaires, 519 (58% of 886 respondents) expressed their support. The other was the subject-centered medical English teaching for graduate students. Out of the 757 valid questionnaires, 715 ( 80% of 886 respondents) expressed the support.
